# Supplementary material for: Acute therapeutic management of M1-middle cerebral artery occlusion with underlying intracranial atherosclerotic disease: is mechanical thrombectomy the right first-line choice?
Source: Research Square preprint supplement (doi:10.21203/rs.3.rs-7897991/v1), 2025-11-04
Supplement: Supplementary file 1 [file 83da74831eda673658501b9a.pdf]

## Supplemental material

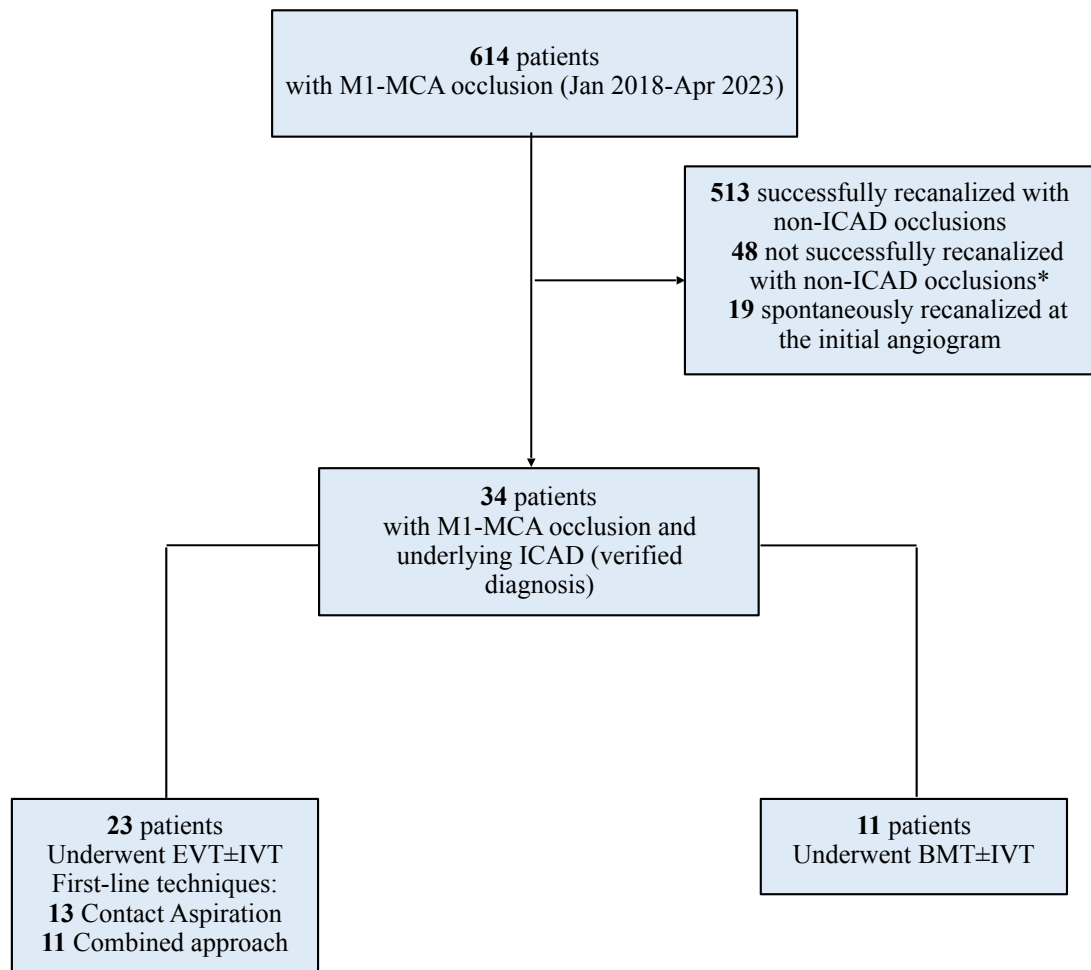

**Supplemental Fig.1.** Flow-chart of the study: MCA: middle cerebral artery; ICAD: intracranial atherosclerotic disease; EVT: endovascular treatment; BMT: best medical therapy.

\*in 7 patients it was not possible to fully exclude an underlying ICAD, however no other factors rising up the suspicion of ICAD were present
